# Supplementary material
Source: MDPI journal article supplement (https://www.mdpi.com/2073-4441/9/8/592)
Supplement: s1 [file s1]

# Supplementary Materials: Inventory Tree-Shaped Structure

## Water Conveyance Facility

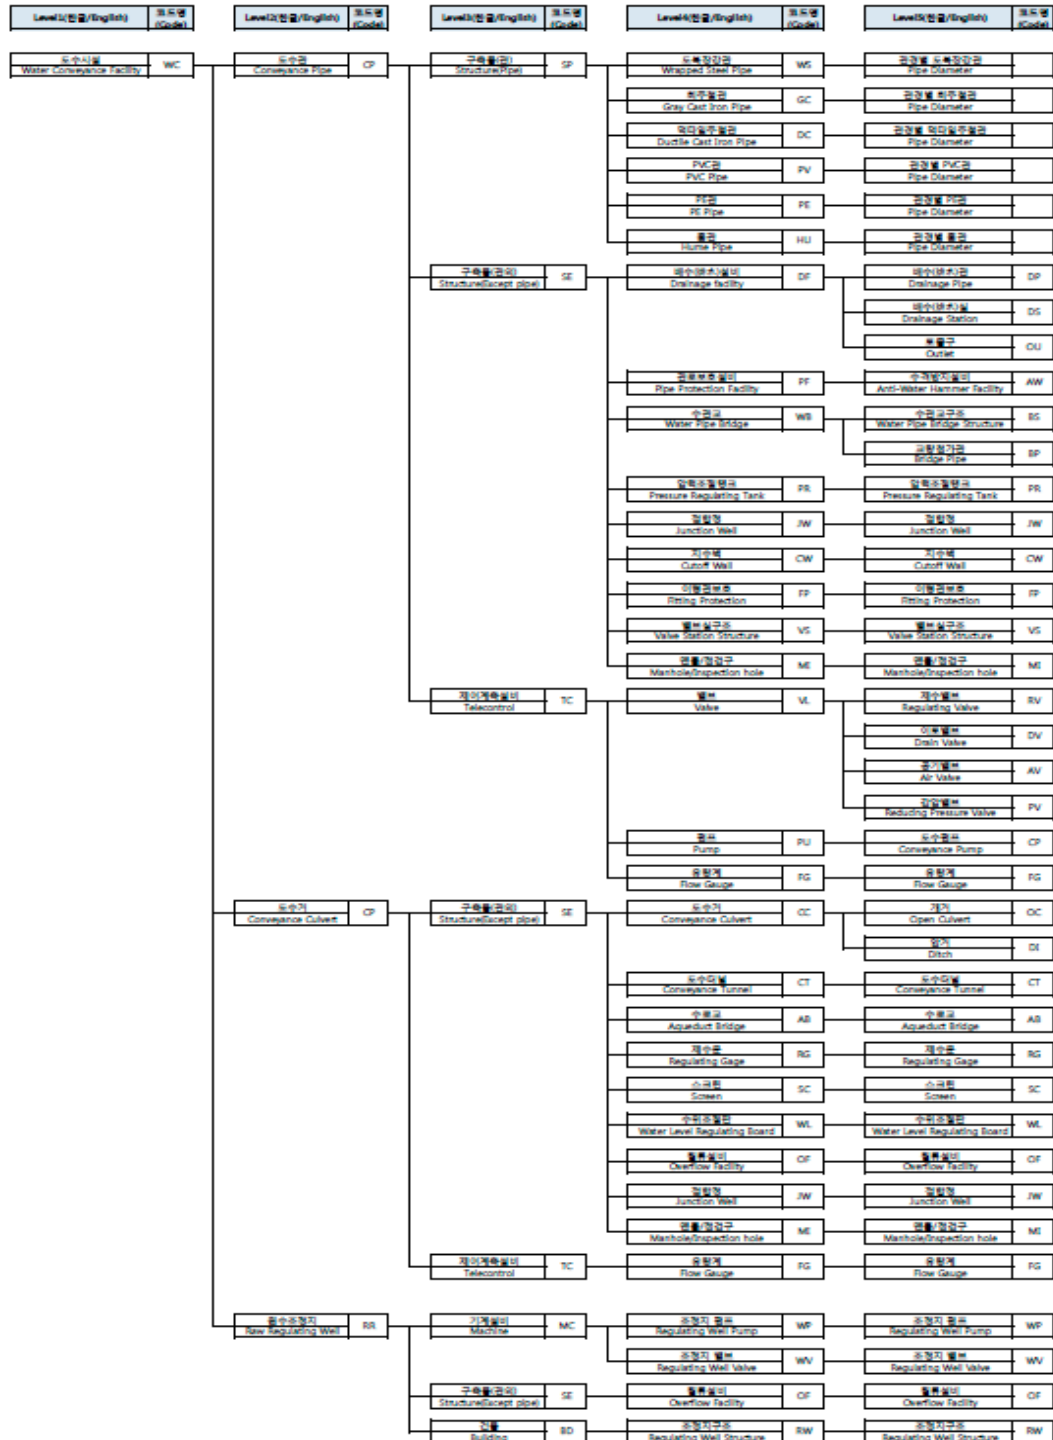

Figure S1. Hierarchical structure of water conveyance facility.

## Water Transmission Facility

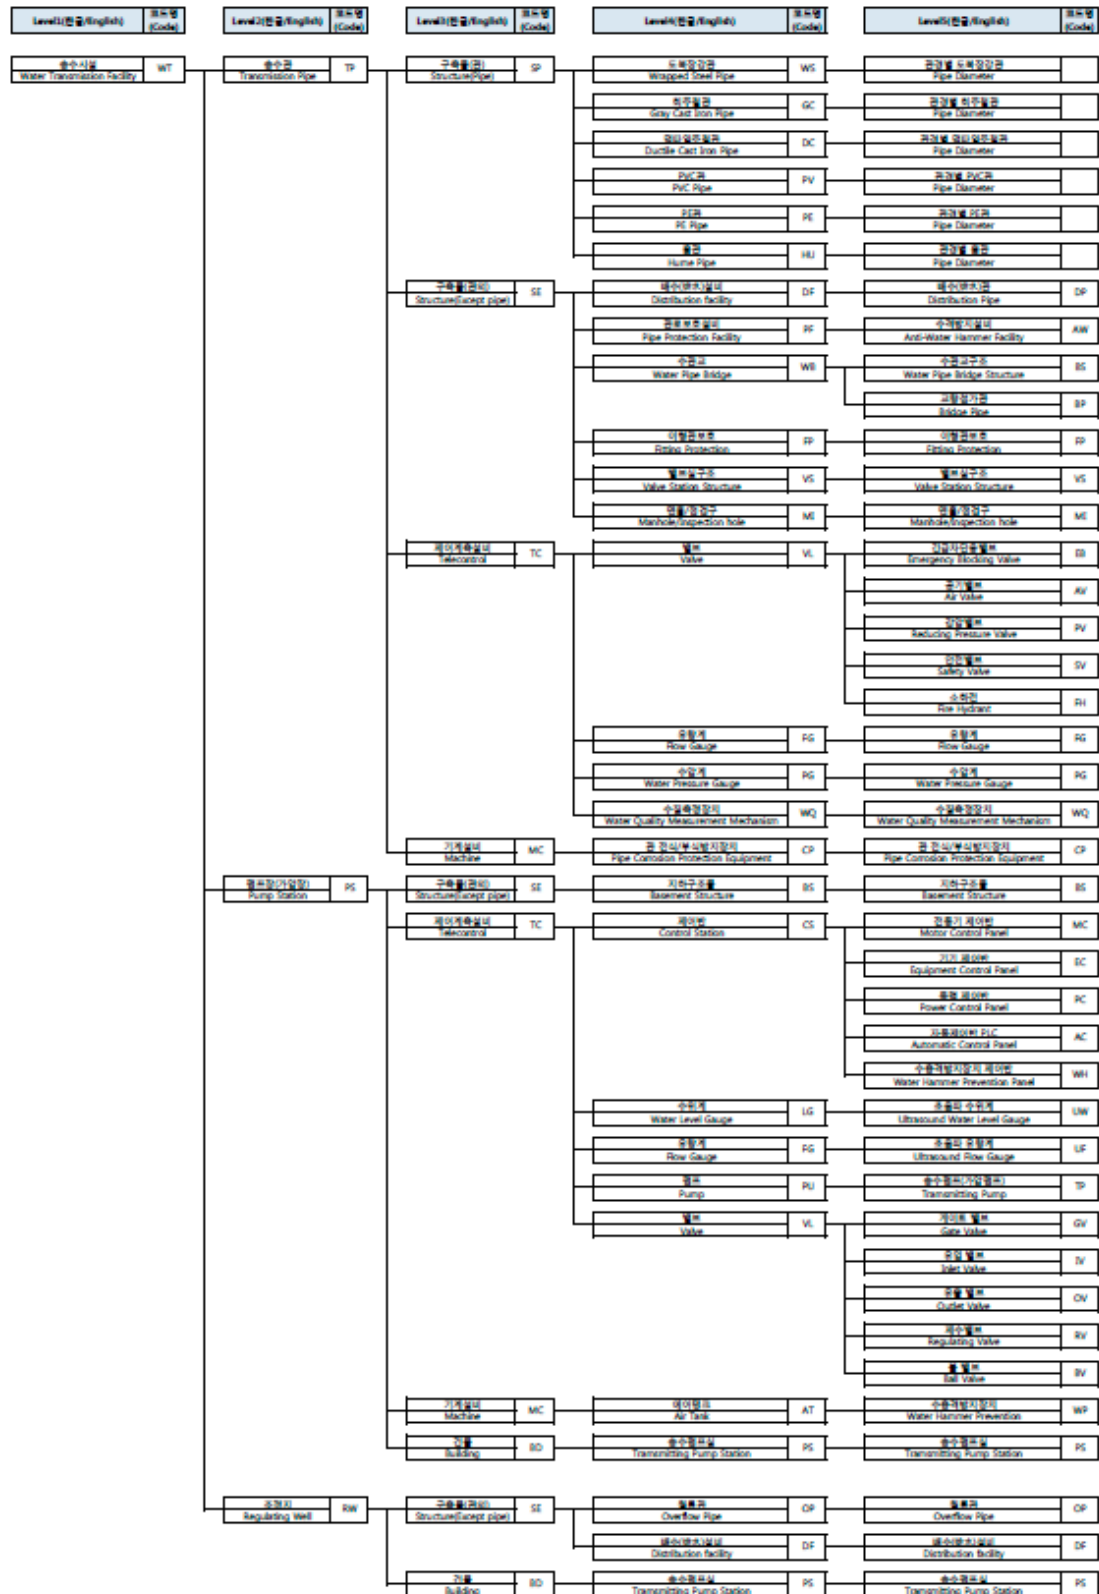

Figure S2. Hierarchical structure of water transmission facility.

## Water Distribution Facility

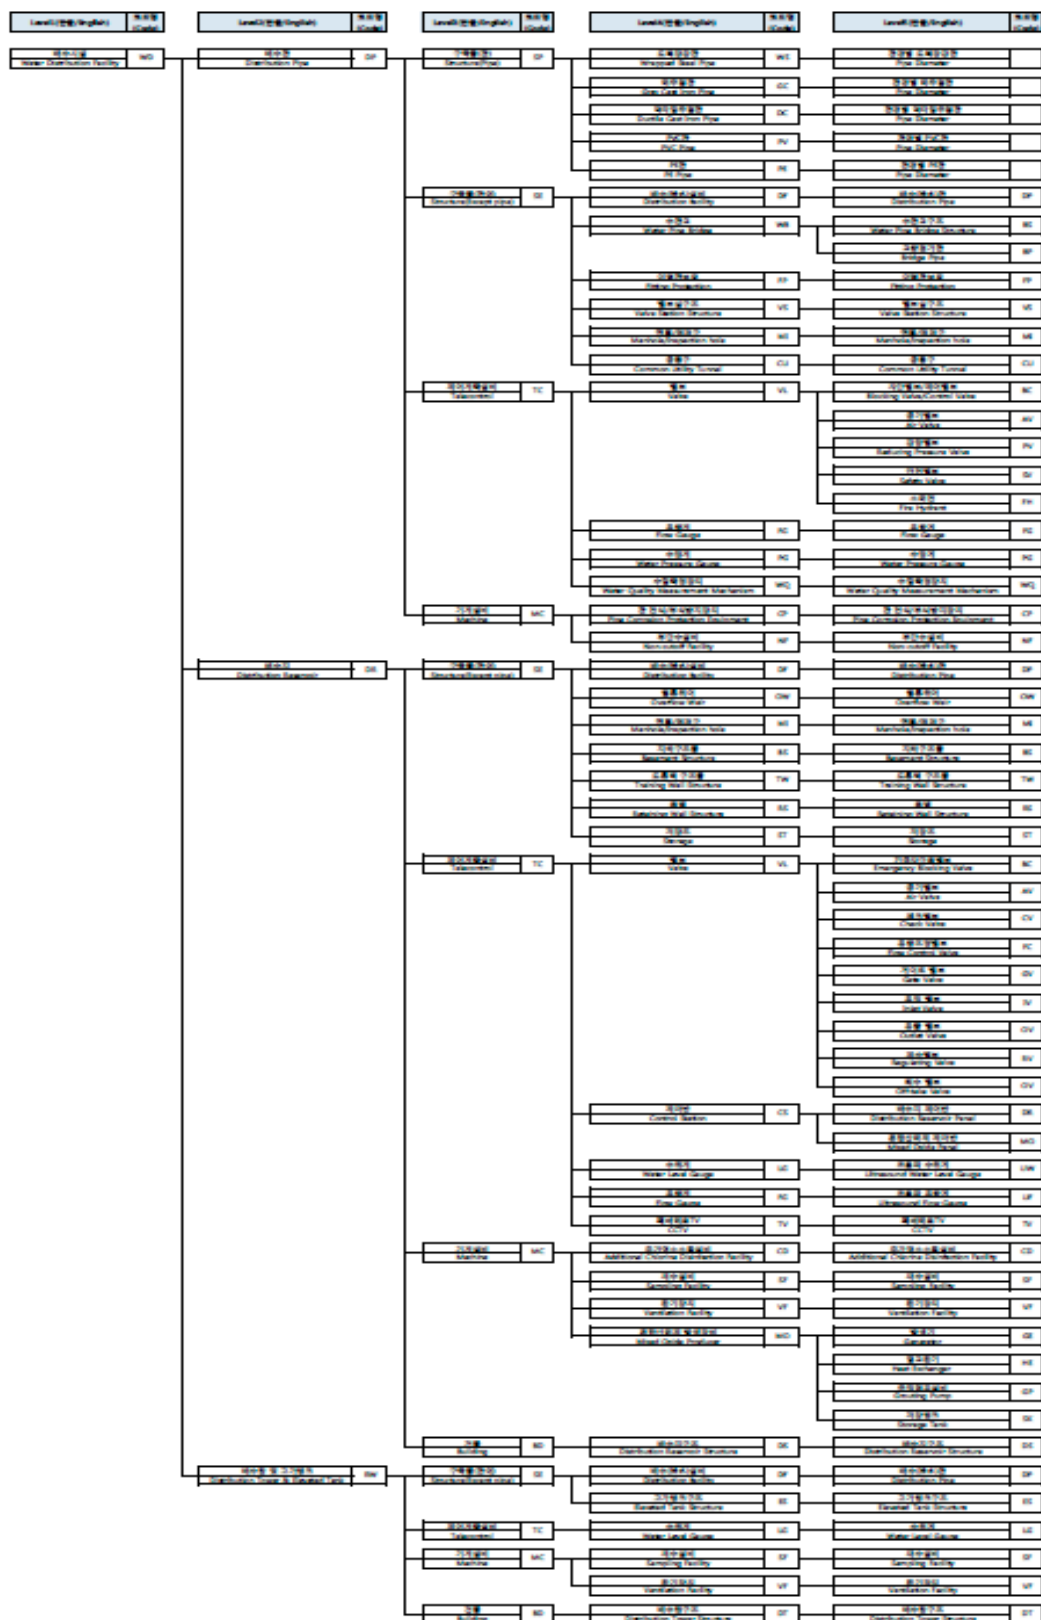

**Figure S3.** Hierarchical structure of water distribution facility.

## Water Supply Facility

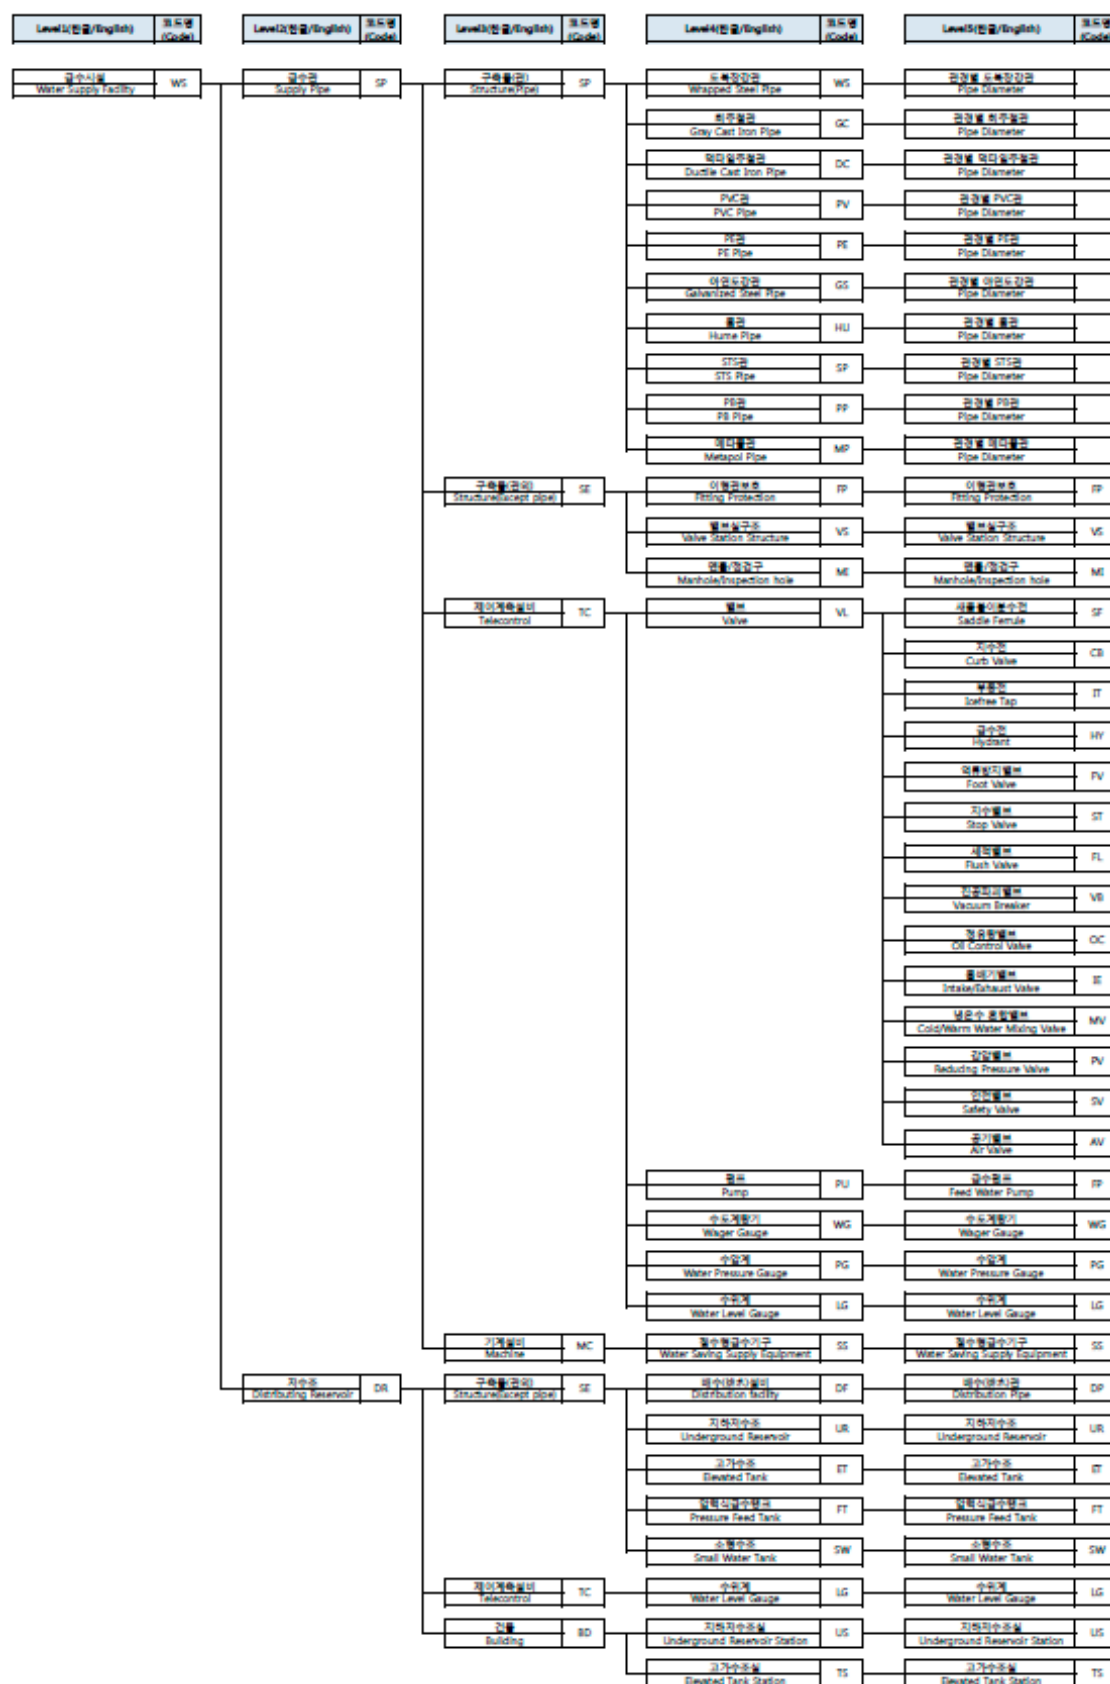

**Figure S4.** Hierarchical structure of water supply facility.
